# Supplementary material
Source: PubMed Central journal article supplement (PMC7173806)

# THE LANCET Infectious Diseases

## Supplementary webappendix

This webappendix formed part of the original submission. We post it as supplied by the authors.

Supplement to: Valette X, du Cheyron D, Goursaud S. Mediastinal lymphadenopathy in patients with severe COVID-19. *Lancet Infect Dis* 2020; published online April 21. [https://doi.org/10.1016/S1473-3099\(20\)30310-8](https://doi.org/10.1016/S1473-3099(20)30310-8).

## Mediastinal lymphadenopathy in patients with severe COVID-19

### Appendix

**Figure:** Chest computed tomography of a 71 years-old man hospitalized in intensive care unit for acute respiratory failure related to COVID-19 pneumonia. A highly enlarged subcarinal lymph node was observed in A) axial plane B) coronal plane.

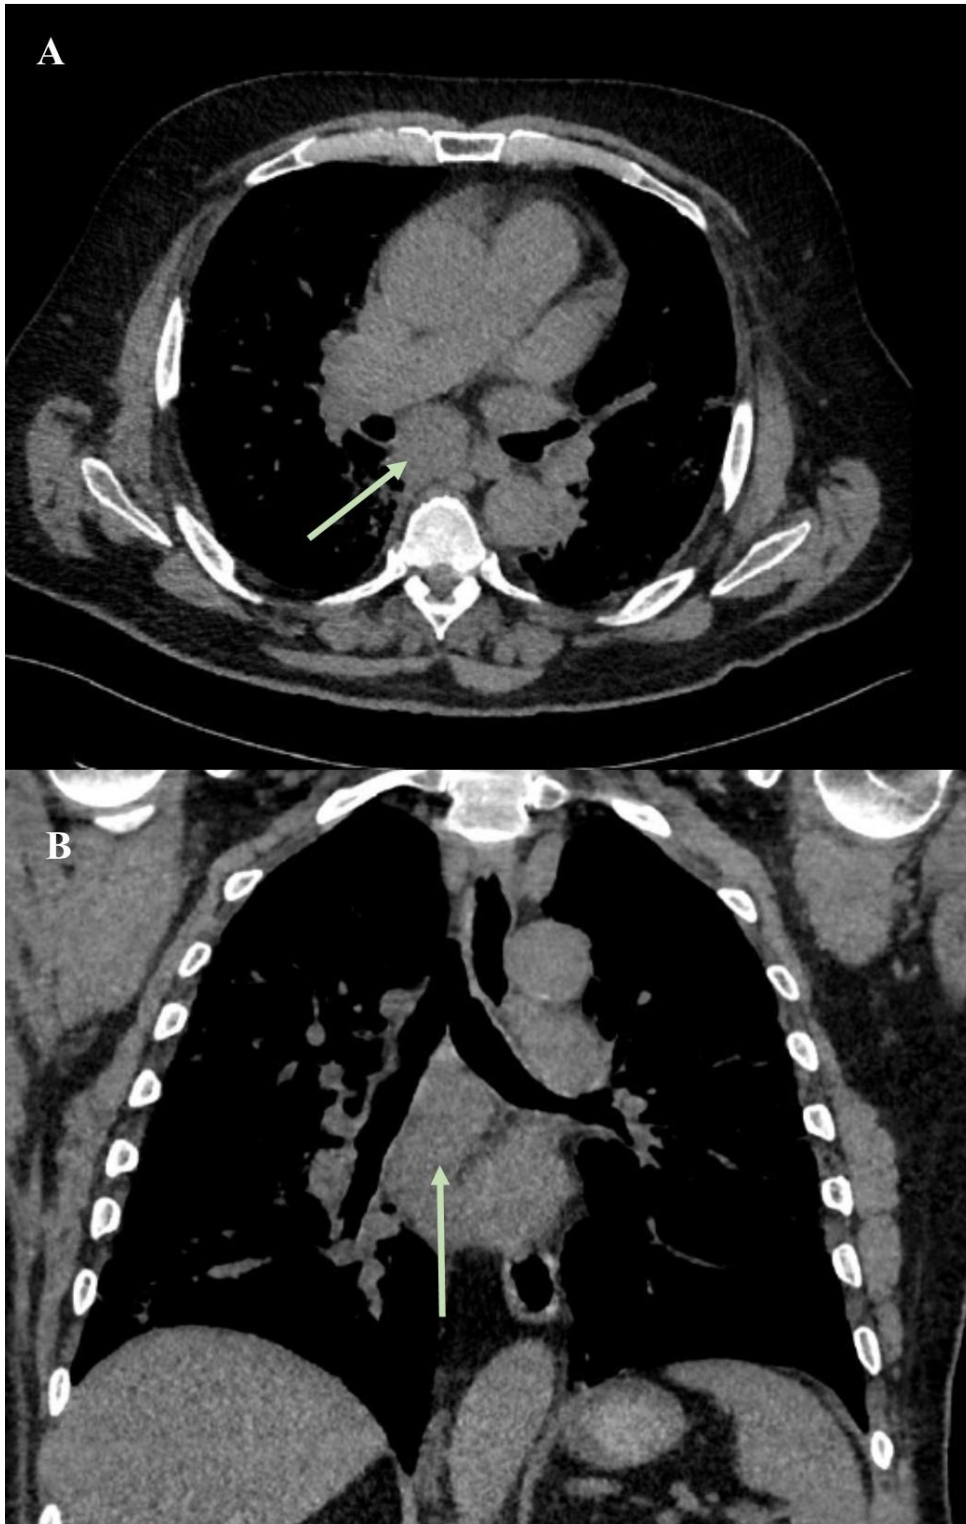

Supplement: mmc1.pdf [file mmc1.pdf]
